# Supplementary material for: Solvothermal syntheses, characterizations and properties of three transition metal (Ni(ii), Co(ii)) imino-carboxylate-diphosphonates
Source: Royal Society of Chemistry journal article supplement (doi:10.1039/b814080d), 2009-01-01
Supplement: b814080d.pdf [file b814080d.pdf]

## **Solvothermal syntheses, characterizations and properties of three transition-metal ( $\text{Ni}^{\text{II}}$ , $\text{Co}^{\text{II}}$ ) imino-carboxylate-diphosphonates**

**Kuirong Ma,<sup>a,b</sup> Jianing Xu,<sup>a</sup> Lirong Zhang,<sup>a</sup> Jing Shi,<sup>a</sup> Daojun Zhang,<sup>a</sup> Yulan Zhu,<sup>b</sup>  
Yong Fan,<sup>a\*</sup> Tianyong Song<sup>a\*</sup>**

*[a] State Key Laboratory of Inorganic Synthesis and Preparative Chemistry, College of Chemistry, Jilin University, Changchun, Jilin / P. R. China, E-mail: [mrfy@jlu.edu.cn](mailto:mrfy@jlu.edu.cn).*

*[b] Jiangsu key laboratory for chemistry of low-dimensional materials, Department of Chemistry, Huaiyin Teachers College, Huaian, Jiangsu / P. R. China.*

**Fig. SA1.** One-dimensional O–H···O hydrogen-bonded chain of **1** down the *c* axis. State the Ni-centred octahedra are shaded in green and that the hydrogen atoms are in white. Hydrogen bonds are drawn as dotted blue lines.

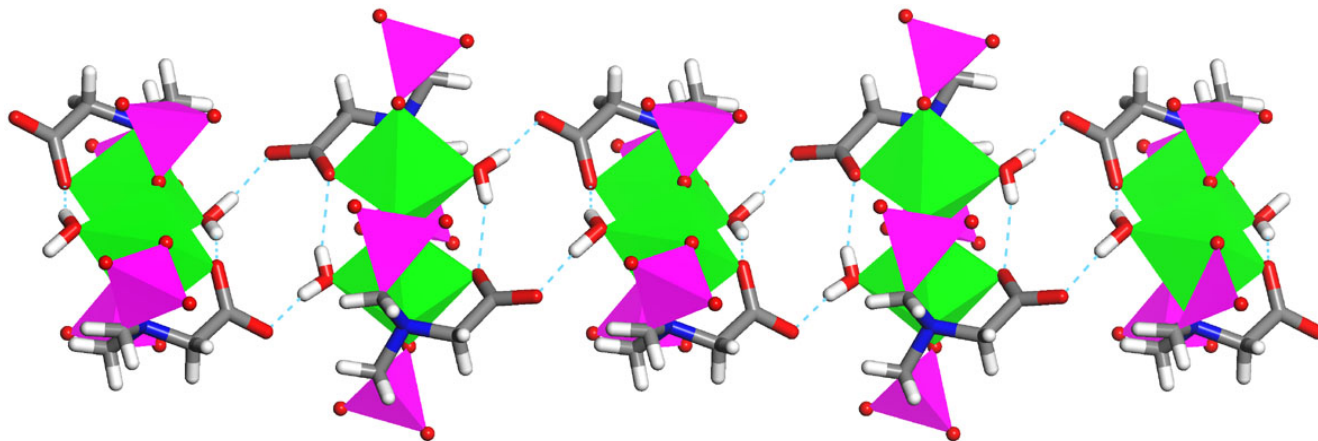

**Fig. SA2.** Three-dimensional O–H···N (NH<sub>4</sub><sup>+</sup>) hydrogen-bonded network of **1** down the *x* axis. Hydrogen bonds are drawn as dotted blue lines. 1,3-PDA cations are omitted for clarity.

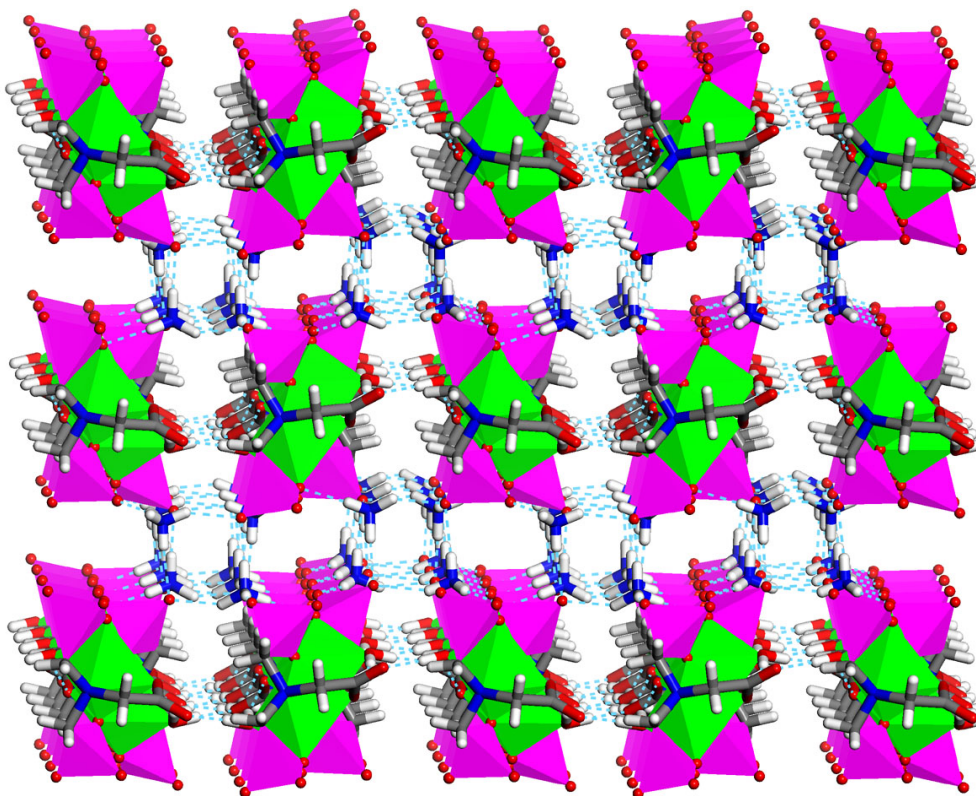

**Fig. SA3** One-dimensional O–H···O hydrogen-bonded chain in the crystal structure of **2** down the *b* axis. Hydrogen bonds are drawn as dotted blue lines. State the Ni-centred octahedra are shaded in green and that the hydrogen atoms are in white.

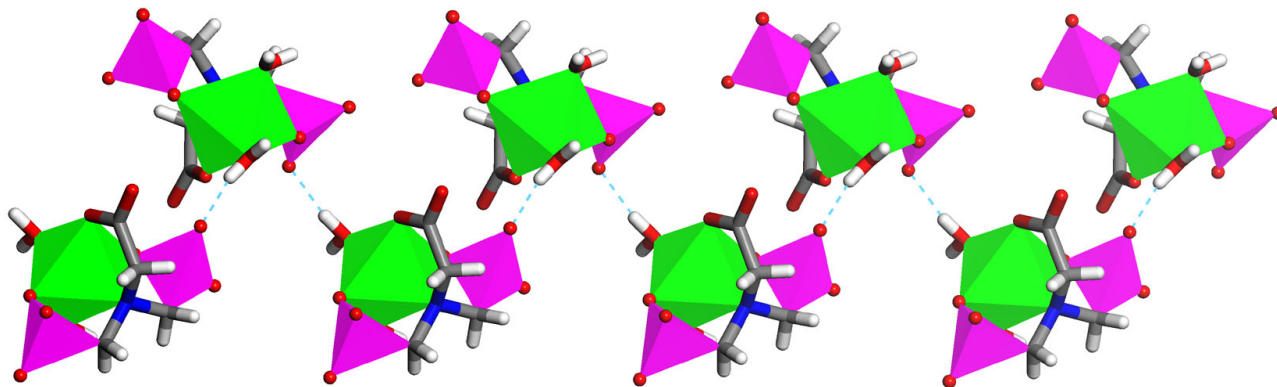

**Fig. SA4** Two-dimensional O–H···O hydrogen-bonded network in the crystal structure of **2** in the *ac* plane. Hydrogen bonds are drawn as dotted blue lines.

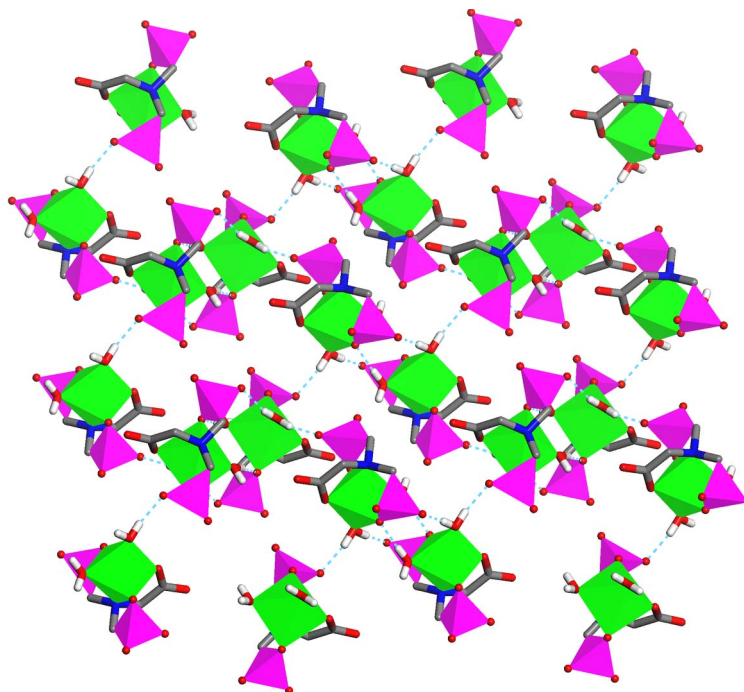

**Fig. SA5.** Two-dimensional network built from water chains of **2**. Hydrogen bonds are drawn as dotted blue lines.

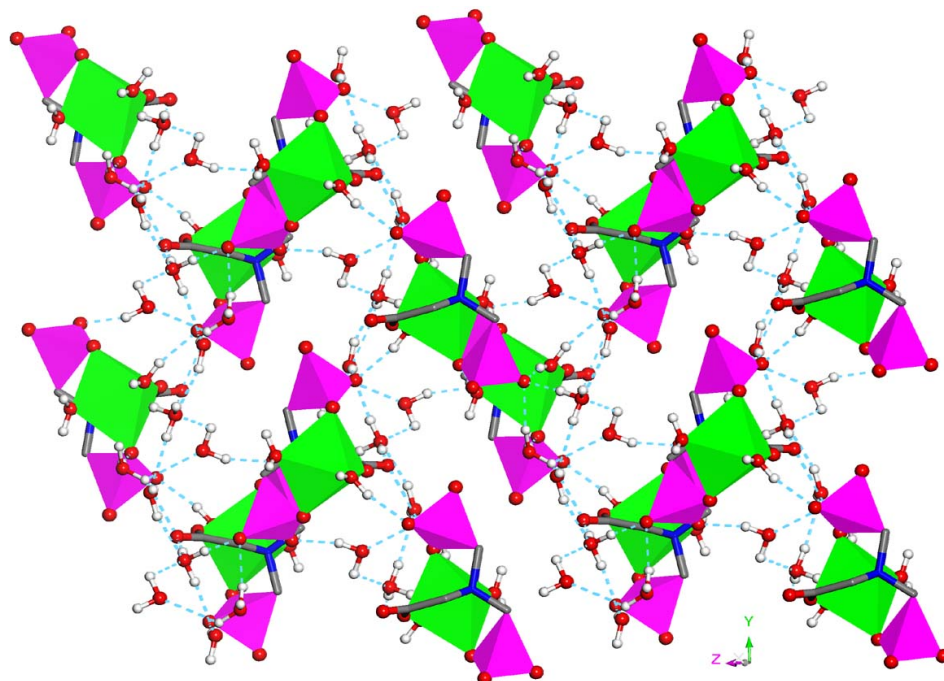

**Fig. SA6** One-dimensional O–H···O hydrogen-bonded chain in the crystal structure of **3** down the *b* axis. Hydrogen bonds are drawn as dotted blue lines. State the Co-centred octahedra are shaded in green and that the hydrogen atoms are in white.

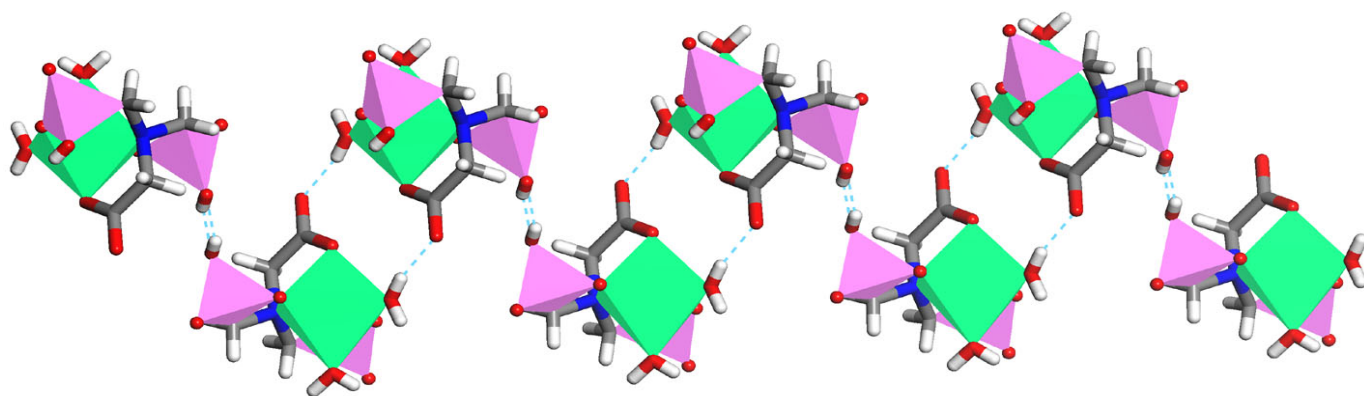

**Fig. SA7** Two-dimensional O–H···O hydrogen-bonded network in the crystal structure of **3** in the *ab* plane. Lattice waters are omitted for clarity. Hydrogen bonds are drawn as dotted blue lines.

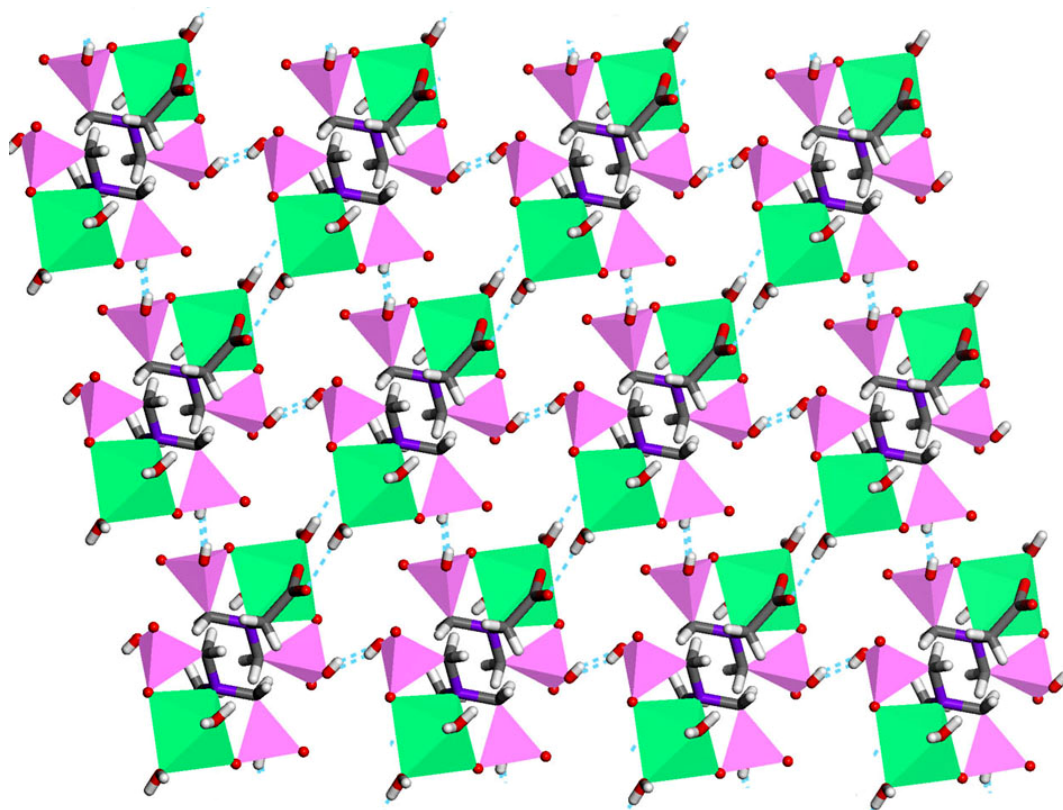

**Fig. SA8** Two-dimensional O–H···O hydrogen-bonded network in the crystal structure of **3** in the *bc* plane. Lattice waters are omitted for clarity. Hydrogen bonds are drawn as dotted blue lines.

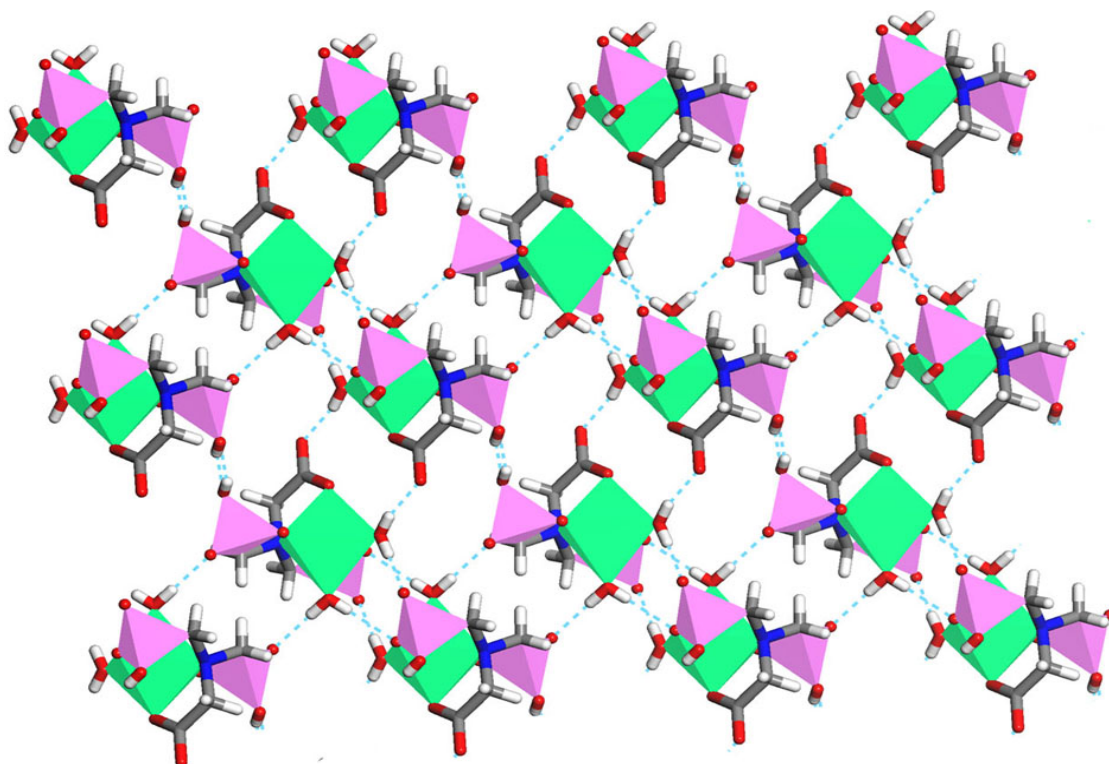

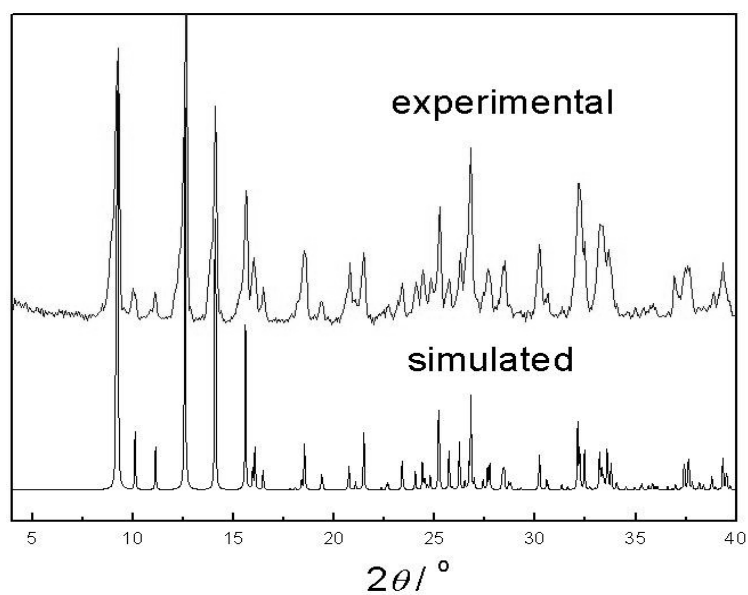

**Fig. SB1** Experimental and simulated powder X-ray diffraction patterns of compound 1.

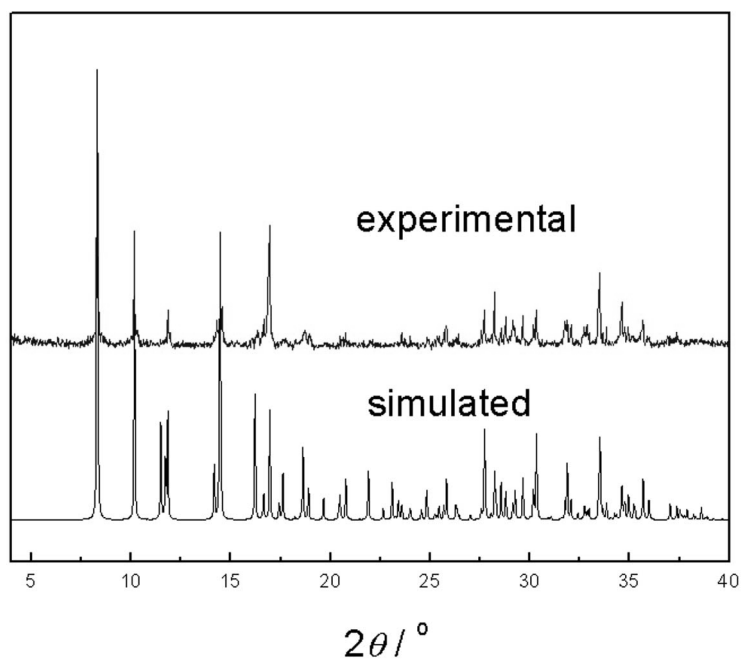

**Fig. SB2** Experimental and simulated powder X-ray diffraction patterns of compound 2.

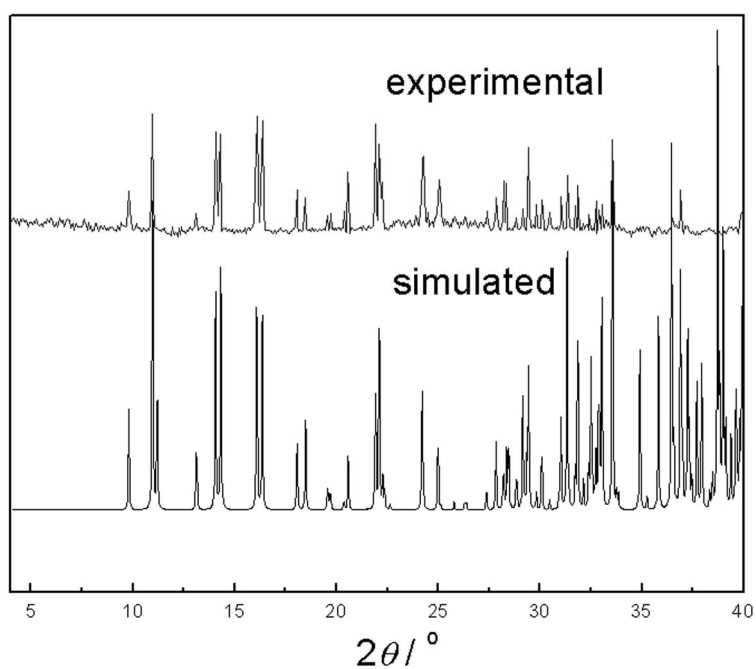

**Fig. SB3** Experimental and simulated powder X-ray diffraction patterns of compound 3.

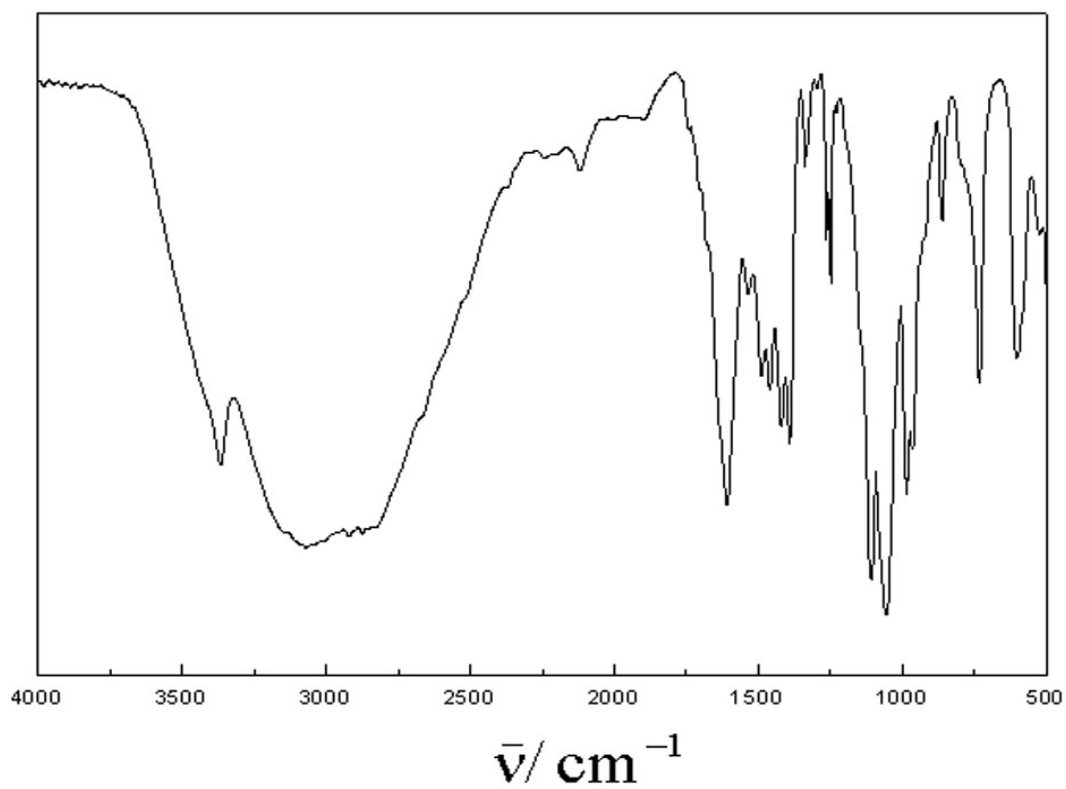

**Fig. SC1** FTIR spectrum of the compound 1.

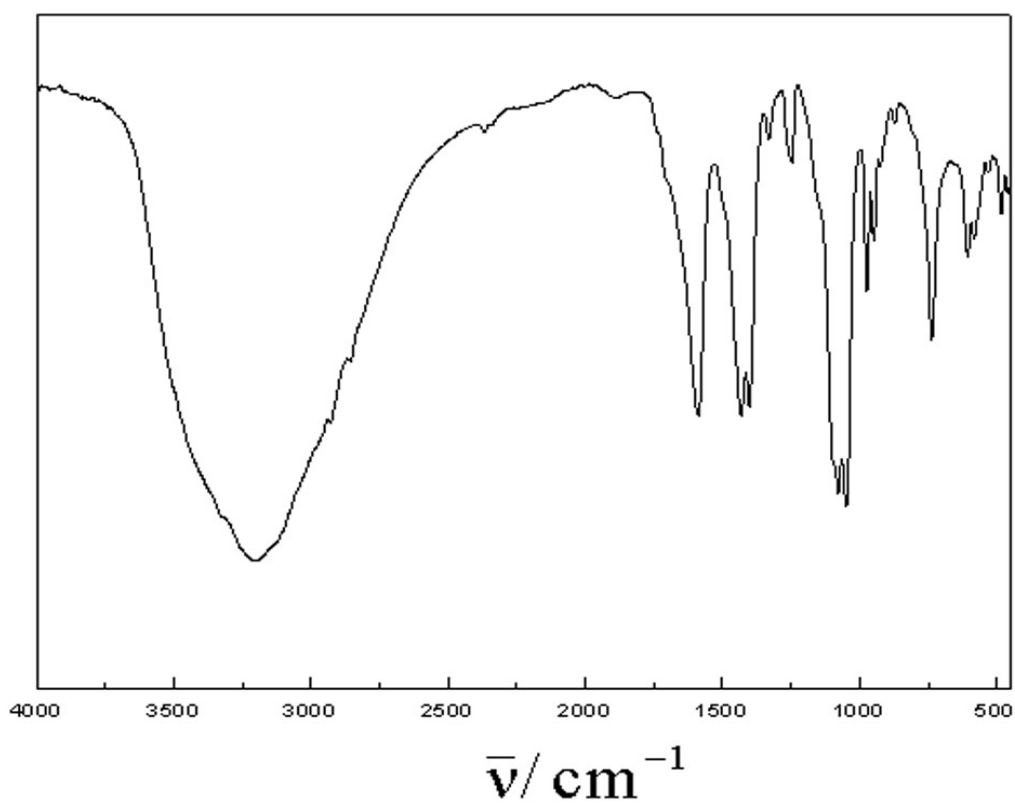

**Fig. SC2** FTIR spectrum of the compound **2**.

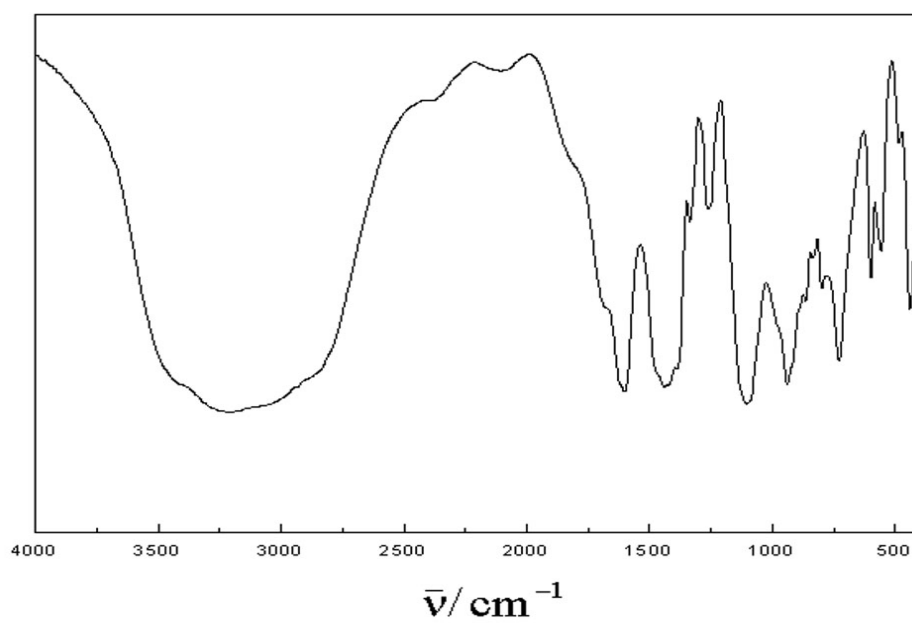

**Fig. SC3** FTIR spectrum of the compound **3**.



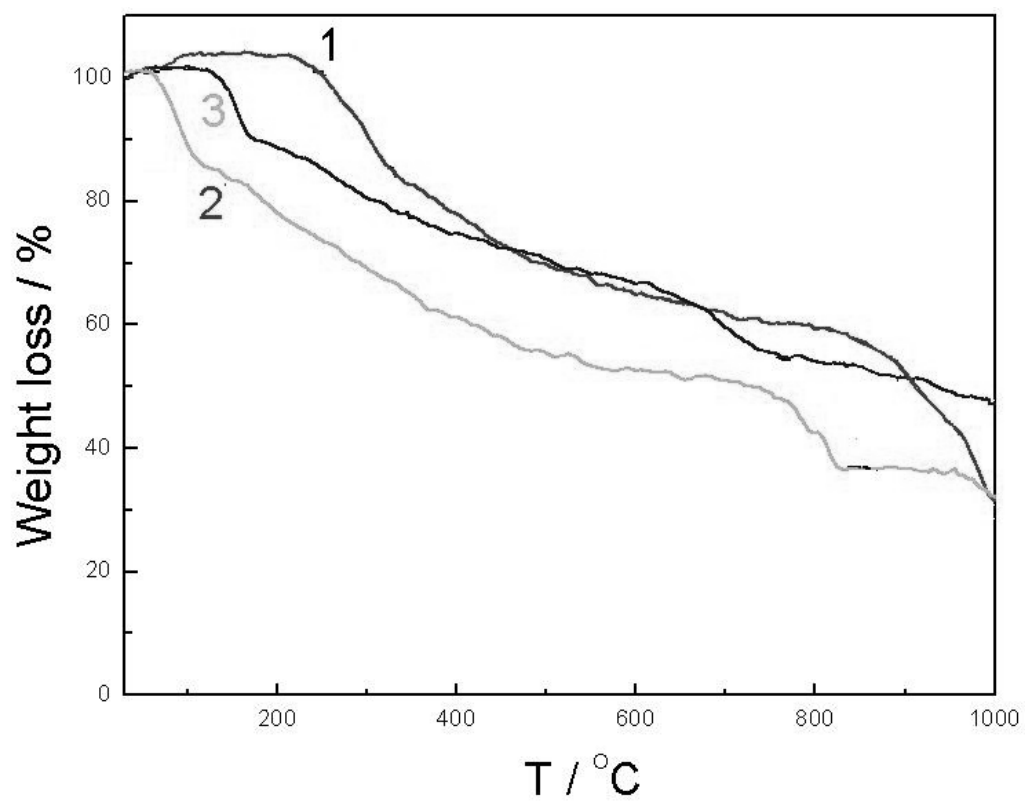

**Fig. SD** TGA curves of compounds 1–3.

**Table S1.** Selected Bond Lengths [ $\text{\AA}$ ] and Angles [ $^\circ$ ] of Compounds 1–3.

|                                |           |                                |           |                                 |           |                               |           |
|--------------------------------|-----------|--------------------------------|-----------|---------------------------------|-----------|-------------------------------|-----------|
| <b>Compound 1</b>              |           |                                |           |                                 |           |                               |           |
| Ni(1)-O(1) <sup>#1</sup>       | 2.037(2)  | Ni(1)-O(9)                     | 2.102(2)  | P(1)-O(1)                       | 1.534(2)  | P(2)-O(4)                     | 1.537(2)  |
| Ni(1)-O(1)                     | 2.094(2)  | Ni(1)-N(1)                     | 2.098(2)  | P(1)-O(2)                       | 1.521(2)  | P(2)-O(5)                     | 1.518(2)  |
| Ni(1)-O(4)                     | 2.043(2)  | P(1)-C(1)                      | 1.831(2)  | P(1)-O(3)                       | 1.510(2)  | P(2)-O(6)                     | 1.518(2)  |
| Ni(1)-O(7)                     | 2.051(2)  | P(2)-C(2)                      | 1.837(2)  | O(4)-Ni(1)-N(1)                 | 84.27(6)  | O(1)-P(1)-C(1)                | 102.33(9) |
| O(1) <sup>#1</sup> -Ni(1)-O(4) | 103.81(6) | O(7)-Ni(1)-N(1)                | 84.44(7)  | O(3)-P(1)-O(1)                  | 112.48(9) | O(3)-P(1)-O(2)                | 112.61(9) |
| O(1) <sup>#1</sup> -Ni(1)-O(7) | 86.65(7)  | O(1)-Ni(1)-N(1)                | 87.70(6)  | O(2)-P(1)-O(1)                  | 111.98(9) | O(6)-P(2)-O(4)                | 111.61(1) |
| O(4)-Ni(1)-O(7)                | 94.05(7)  | O(1) <sup>#1</sup> -Ni(1)-O(9) | 88.75(7)  | O(3)-P(1)-C(1)                  | 111.21(1) | C(3)-N(1)-Ni(1)               | 105.25(1) |
| O(1) <sup>#1</sup> -Ni(1)-O(1) | 84.55(6)  | O(4)-Ni(1)-O(9)                | 90.45(7)  | O(2)-P(1)-C(1)                  | 105.53(1) | C(1)-N(1)-Ni(1)               | 107.68(1) |
| O(4)-Ni(1)-O(1)                | 171.48(6) | O(7)-Ni(1)-O(9)                | 174.22(7) | P(2)-O(4)-Ni(1)                 | 117.53(9) | C(2)-N(1)-Ni(1)               | 108.61(1) |
| O(7)-Ni(1)-O(1)                | 88.00(6)  | O(1)-Ni(1)-O(9)                | 88.07(7)  | Ni(1) <sup>#1</sup> -O(1)-Ni(1) | 95.45(6)  | P(1)-O(1)-Ni(1) <sup>#1</sup> | 146.66(9) |
| O(1) <sup>#1</sup> -Ni(1)-N(1) | 168.39(6) | N(1)-Ni(1)-O(9)                | 99.64(7)  | C(4)-O(7)-Ni(1)                 | 113.85(1) | P(1)-O(1)-Ni(1)               | 115.71(8) |
|                                |           |                                |           |                                 |           | O(6)-P(2)-O(5)                | 113.66(1) |
| <b>Compound 2</b>              |           |                                |           |                                 |           |                               |           |
| Ni(1)-O(1)                     | 2.038(2)  | Ni(1)-O(10)                    | 2.115(2)  | P(1)-O(1)                       | 1.544(2)  | P(2)-O(4)                     | 1.539(2)  |
| Ni(1)-O(4)                     | 2.042(2)  | Ni(1)-N(1)                     | 2.125(2)  | P(1)-O(2)                       | 1.517(2)  | P(2)-O(5)                     | 1.522(2)  |
| Ni(1)-O(7)                     | 2.055(2)  | P(1)-C(1)                      | 1.828(3)  | P(1)-O(3)                       | 1.524(2)  | P(2)-O(6)                     | 1.517(2)  |
| Ni(1)-O(9)                     | 2.086(2)  | P(2)-C(2)                      | 1.828(3)  |                                 |           |                               |           |
| O(7)-Ni(1)-O(10)               | 178.23(8) | O(9)-Ni(1)-N(1)                | 173.76(8) | O(2)-P(1)-O(1)                  | 111.84(1) | O(5)-P(2)-O(4)                | 113.67(1) |
| O(7)-Ni(1)-O(9)                | 90.43(8)  | O(1)-Ni(1)-N(1)                | 85.82(7)  | O(3)-P(1)-O(1)                  | 111.59(1) | P(1)-O(1)-Ni(1)               | 116.17(1) |
| O(10)-Ni(1)-O(9)               | 91.33(8)  | O(7)-Ni(1)-O(4)                | 92.34(8)  | O(2)-P(1)-C(1)                  | 109.33(1) | P(2)-O(4)-Ni(1)               | 113.92(1) |
| O(7)-Ni(1)-O(1)                | 92.69(8)  | O(10)-Ni(1)-O(4)               | 87.46(8)  | O(3)-P(1)-C(1)                  | 106.75(1) | C(4)-O(7)-Ni(1)               | 115.03(2) |
| O(10)-Ni(1)-O(1)               | 87.28(8)  | O(9)-Ni(1)-O(4)                | 92.04(8)  | O(1)-P(1)-C(1)                  | 103.72(1) | C(3)-N(1)-Ni(1)               | 107.03(2) |
| O(9)-Ni(1)-O(1)                | 95.59(8)  | O(1)-Ni(1)-O(4)                | 170.83(7) | O(6)-P(2)-O(5)                  | 112.71(1) | C(1)-N(1)-Ni(1)               | 106.53(1) |
| O(7)-Ni(1)-N(1)                | 83.42(8)  | N(1)-Ni(1)-O(4)                | 87.15(7)  | O(6)-P(2)-O(4)                  | 111.47(1) | C(2)-N(1)-Ni(1)               | 107.89(2) |
| O(10)-Ni(1)-N(1)               | 94.81(8)  | O(2)-P(1)-O(3)                 | 113.04(1) |                                 |           |                               |           |
| <b>Compound 3</b>              |           |                                |           |                                 |           |                               |           |
| Co(1)-O(1)                     | 2.084(2)  | Co(1)-O(6)                     | 2.128(2)  | P(1)-O(3)                       | 1.521(2)  | P(2)-O(4)                     | 1.508(2)  |
| Co(1)-O(2)                     | 2.051(2)  | Co(1)-N(1)                     | 2.183(2)  | P(1)-O(8)                       | 1.539(2)  | P(2)-O(6)                     | 1.528(2)  |
| Co(1)-O(3)                     | 2.115(2)  | P(2)-C(1)                      | 1.823(2)  | P(1)-O(9)                       | 1.496(2)  | P(2)-O(7)                     | 1.543(2)  |
| Co(1)-O(5)                     | 2.082(2)  | P(1)-C(2)                      | 1.824(2)  |                                 |           |                               |           |
| O(2)-Co(1)-O(5)                | 91.50(8)  | O(5)-Co(1)-O(6)                | 93.04(8)  | O(6)-Co(1)-N(1)                 | 84.21(7)  | C(3)-O(2)-Co(1)               | 116.33(1) |
| O(2)-Co(1)-O(1)                | 179.01(8) | O(1)-Co(1)-O(6)                | 92.16(8)  | O(9)-P(1)-O(3)                  | 113.96(1) | P(1)-O(3)-Co(1)               | 116.10(9) |
| O(5)-Co(1)-O(1)                | 88.46(9)  | O(3)-Co(1)-O(6)                | 169.57(6) | O(9)-P(1)-O(8)                  | 112.42(1) | C(2)-N(1)-Co(1)               | 106.95(1) |
| O(2)-Co(1)-O(3)                | 89.66(8)  | O(2)-Co(1)-N(1)                | 81.97(7)  | O(3)-P(1)-O(8)                  | 111.38(1) | C(1)-N(1)-Co(1)               | 106.01(1) |
| O(5)-Co(1)-O(3)                | 97.32(8)  | O(5)-Co(1)-N(1)                | 172.95(8) | O(4)-P(2)-O(6)                  | 113.27(1) | C(4)-N(1)-Co(1)               | 106.95(1) |
| O(1)-Co(1)-O(3)                | 89.37(8)  | O(1)-Co(1)-N(1)                | 98.12(8)  | O(4)-P(2)-O(7)                  | 111.77(1) | P(2)-O(6)-Co(1)               | 116.18(9) |
| O(2)-Co(1)-O(6)                | 88.83(7)  | O(3)-Co(1)-N(1)                | 85.36(7)  | O(6)-P(2)-O(7)                  | 112.15(1) |                               |           |

Symmetry transformations used to generate equivalent atoms:

<sup>#1</sup> -x+1, -y+1, -z    <sup>#2</sup> -x+1/2, y-1/2, z

**Table S2.** Hydrogen Bonds [ $\text{\AA}$ ] and Angles [ $^\circ$ ] for Compounds 1–3.

| D-H...A                 | d(D-H)   | d(H...A) | d(D...A) | $\angle(\text{DHA})$ |
|-------------------------|----------|----------|----------|----------------------|
| <b>Compound 1</b>       |          |          |          |                      |
| N(2)-H(4)...O(3)#1      | 0.89     | 1.94     | 2.821(2) | 171.7                |
| N(2)-H(5)...O(6)#3      | 0.89     | 1.88     | 2.752(2) | 165.6                |
| N(2)-H(6)...O(4)        | 0.89     | 2.25     | 2.894(2) | 129.1                |
| N(2)-H(6)...O(5)        | 0.89     | 2.39     | 3.190(3) | 149.1                |
| O(9)-H(1)...O(7)#1      | 0.74(3)  | 2.14(3)  | 2.849(2) | 161(3)               |
| O(9)-H(2)...O(8)#4      | 0.93(4)  | 1.81(4)  | 2.732(3) | 171(3)               |
| N(3)-H(7)...O(2)#2      | 0.85(3)  | 2.03(3)  | 2.879(2) | 177(3)               |
| N(3)-H(8)...O(2)        | 0.99(3)  | 1.95(3)  | 2.833(2) | 147(3)               |
| N(3)-H(9)...O(4)#4      | 0.88(3)  | 1.84(3)  | 2.696(2) | 164(3)               |
| N(3)-H(10)...O(5)#5     | 1.00(3)  | 1.74(3)  | 2.740(2) | 175(3)               |
| N(4)-H(11)...O(3)#1     | 0.87(3)  | 1.97(3)  | 2.832(2) | 169(3)               |
| N(4)-H(12)...O(2)#6     | 0.86(3)  | 1.96(3)  | 2.809(2) | 169(3)               |
| N(4)-H(13)...O(6)#7     | 0.95(4)  | 1.86(4)  | 2.799(2) | 170(3)               |
| N(4)-H(14)...O(5)#2     | 0.90(4)  | 2.05(4)  | 2.878(2) | 152(3)               |
| <b>Compound 2</b>       |          |          |          |                      |
| O(9)-H(9A)...O(6)#1     | 0.880(2) | 1.86(2)  | 2.730(3) | 168(4)               |
| O(9)-H(9B)...O(3)#2     | 0.861(2) | 1.92(2)  | 2.770(3) | 168(4)               |
| O(10)-H(10A)...O(7W)#3  | 0.884(2) | 1.761(2) | 2.642(3) | 174(4)               |
| O(10)-H(10B)...O(1)#2   | 0.880(2) | 1.84(2)  | 2.714(3) | 175(4)               |
| O(1W)-H(1A)...O(6)#4    | 0.92(2)  | 1.80(2)  | 2.709(4) | 171(5)               |
| O(1W)-H(1B)...O(3W)#5   | 0.91(2)  | 2.20(3)  | 3.035(6) | 152(5)               |
| O(2W)-H(2A)...O(2)      | 0.911(2) | 1.85(2)  | 2.735(4) | 162(4)               |
| O(3W)-H(3A)...O(8)      | 0.940(2) | 1.79(2)  | 2.727(4) | 177(5)               |
| O(3W)-H(3B)...O(1W)#4   | 0.932(2) | 2.35(3)  | 3.276(8) | 165(5)               |
| O(3W)-H(3C)...O(3)#4    | 0.922(2) | 1.82(2)  | 2.720(4) | 163(4)               |
| O(4W)-H(4A)...O(2)      | 0.880(2) | 1.81(2)  | 2.685(3) | 177(5)               |
| O(4W)-H(4B)...O(5)#6    | 0.89(2)  | 1.92(2)  | 2.801(4) | 179(5)               |
| O(5W)-H(5B)...O(8)#7    | 0.969(2) | 2.39(3)  | 3.206(4) | 142(4)               |
| O(5W)-H(5B)...O(2W)#7   | 0.969(2) | 2.38(4)  | 3.055(4) | 126(3)               |
| O(5W)-H(5C)...O(3)#2    | 0.954(2) | 1.94(2)  | 2.882(3) | 170(4)               |
| O(6W)-H(6A)...O(1)      | 0.958(2) | 1.88(2)  | 2.824(3) | 170(4)               |
| O(6W)-H(6B)...O(5)#6    | 0.96(2)  | 2.10(3)  | 3.007(3) | 156(4)               |
| O(6W)-H(6C)...O(4)#1    | 0.949(2) | 1.91(2)  | 2.848(3) | 172(4)               |
| O(7W)-H(7A)...O(8)#7    | 0.891(2) | 1.86(2)  | 2.736(3) | 166(3)               |
| O(7W)-H(7A)...O(7)#7    | 0.891(2) | 2.53(3)  | 3.221(3) | 135(3)               |
| O(7W)-H(7B)...O(5)      | 0.910(2) | 1.80(2)  | 2.705(3) | 171(4)               |
| <b>Compound 3</b>       |          |          |          |                      |
| O(5)-H(10)...O(11)#5    | 0.76(4)  | 1.98(4)  | 2.718(3) | 166(4)               |
| O(5)-H(11)...O(4)#3     | 0.81(4)  | 1.93(4)  | 2.725(3) | 168(4)               |
| O(1)-H(7)...O(9)#4      | 0.877(2) | 1.80(2)  | 2.666(3) | 167(3)               |
| O(1)-H(8)...O(6)#3      | 0.864(2) | 1.89(2)  | 2.725(3) | 164(3)               |
| O(12W)-H(16)...O(7)#2   | 0.99(4)  | 1.88(4)  | 2.855(3) | 169(3)               |
| O(13W)-H(19)...O(13W)#1 | 0.81(3)  | 2.01(3)  | 2.818(7) | 178(4)               |

Symmetry transformations used to generate equivalent atoms:

Compound 1. #1  $-x+1, -y+1, -z$  #2  $-x+1, y, -z+1/2$  #3  $-x+3/2, -y+1/2, -z$  #4  $x, -y+1, z+1/2$  #5  $-x+3/2, y+1/2, -z+1/2$  #6  $x-1/2, y-1/2, z$  #7  $x-1, y, z$

Compound 2. #1  $-x+3/2, y-1/2, -z+1/2$  #2  $-x+1, -y, -z$  #3  $-x+1, -y+1, -z$  #4  $-x+2, -y, -z$  #5  $x-1/2, -y-1/2, z-1/2$  #6  $x, y-1, z$  #7  $-x+3/2, y+1/2, -z+1/2$

Compound 3. #1  $-x+2, -y+1, -z$  #2  $x+1, y, z$  #3  $-x+1, -y, -z$  #4  $-x+1, -y+1, -z$  #5  $-x+1, -y, -z+1$
